# Supplementary material for: TrkB Promotes Breast Cancer Metastasis via Suppression of Runx3 and Keap1 Expression
Source: PubMed Central journal article supplement — Mol Cells. 2015 Dec 10;39(3):258–65. doi: 10.14348/molcells.2016.2310 (PMC4794608; doi:10.14348/molcells.2016.2310), 2015-12-10
Supplement: molce-39-3-258-supple.pdf [file molce-39-3-258-supple.pdf]

## Supplemental Figure Legends

### **Figure S1. TrkB reduces p21 expression via suppression of Runx3 expression.**

(A) RT-PCR analysis of p21 mRNA levels in MCF10A, MCF10A-TrkB, and MCF10A-TrkB kinase dead mutant cells.  $\beta$ -actin was used as a loading control. (B) RT-PCR analysis of p21 mRNA levels in MDA-MB-231 cells with or without K252a treatment.  $\beta$ -actin was used as a loading control. (C) RT-PCR analysis of p21 mRNA levels in MDA-MB-231 control-shRNA or TrkB-shRNA cells.  $\beta$ -actin was used as a loading control.

### **Figure S2. Inhibition of AKT1 in the presence of TrkB induces expression of p21 via induction of Runx3 expression.**

(A) RT-PCR analysis of p21 mRNA levels in MDA-MB-231 or Hs578T cells with or without LY294002 treatment.  $\beta$ -actin was used as a loading control. (B) RT-PCR analysis of p21 mRNA levels in MDA-MB-231 control-shRNA or AKT1-shRNA cells.  $\beta$ -actin was used as a loading control.

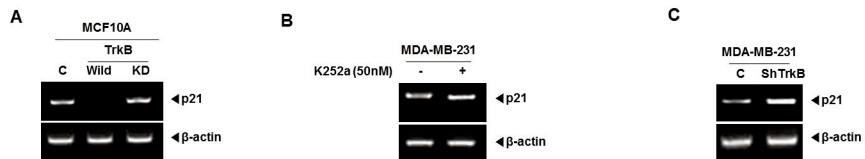

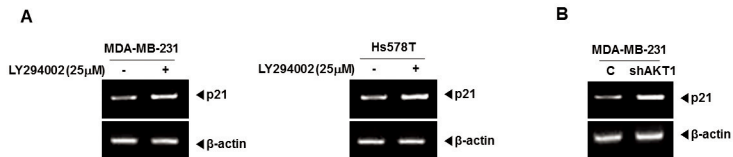

## Supplemental Table

**Supplemental Table 1. Primer sequences for RT-PCR**

| Gene                 | Primers                                                         |
|----------------------|-----------------------------------------------------------------|
| Human Runx3          | F: 5'-TTTCACCCTGACCATCACTG-3'<br>R: 5'-TCGGAGAATGGGTTTCAGTTC-3' |
| Human Keap1          | F: 5'-GAGGCTTACAACCCCAGTGA-3'<br>R: 5'-TCCACACTGTTGTGGTGGAT-3'  |
| Human $\beta$ -actin | F: 5'-TCCCTGGAGAAGAGCTACGA-3'<br>R: 5'-AGCACTGTGTTGGCGTACAG-3'  |

## Supplemental Figure Legends

### **Figure S1. TrkB reduces p21 expression via suppression of Runx3 expression.**

(A) RT-PCR analysis of p21 mRNA levels in MCF10A, MCF01A-TrkB, and MCF10A-TrkB kinase dead mutant cells.  $\beta$ -actin was used as a loading control. (B) RT-PCR analysis of p21 mRNA levels in MDA-MB-231 cells with or without K252a treatment.  $\beta$ -actin was used as a loading control. (C) RT-PCR analysis of p21 mRNA levels in MDA-MB-231 control-shRNA or TrkB-shRNA cells.  $\beta$ -actin was used as a loading control.

### **Figure S2. Inhibition of AKT1 in the presence of TrkB induces expression of p21 via induction of Runx3 expression.**

(A) RT-PCR analysis of p21 mRNA levels in MDA-MB-231 or Hs578T cells with or without LY294002 treatment.  $\beta$ -actin was used as a loading control. (B) RT-PCR analysis of p21 mRNA levels in MDA-MB-231 control-shRNA or AKT1-shRNA cells.  $\beta$ -actin was used as a loading control.
